# Supplementary material for: Bowel ultrasound for predicting surgical management of necrotizing enterocolitis: a systematic review and meta-analysis
Source: Springer Nature journal article supplement (doi:10.1007/s00247-017-4056-x), 2017-12-19
Supplement: MOESM1 [file 15319280]

***Pubmed search:***

("Enterocolitis, Necrotizing"[Mesh] OR "necrotizing enterocolitis" OR "necrotising enterocolitis") AND ("Ultrasonography"[Mesh] OR ultrasonograph\* OR sonograph\* OR ultrasound\*) AND (English[lang])

***CINAHL search:***

((MH "Enterocolitis, Necrotizing") OR "necrotizing enterocolitis" OR "necrotising enterocolitis") AND ((MH "Ultrasonography") OR ultrasonograph\* OR sonograph\* OR ultrasound\*) AND Limiters – English Language, Expanders – Apply related words; Also search within the full text of the articles; Apply equivalent subjects

***Embase search:***

(‘necrotizing enterocolitis’/exp OR ‘necrotizing enterocolitis’ OR ‘necrotising enterocolitis’/exp OR ‘necrotising enterocolitis’) AND (ultrasonograph\* OR sonograph\* OR ultrasound\*) AND [English]/lim AND [embase]/lim NOT [medline]/lim

Online Resource 1: Search strategy for Pubmed, CINAHL, and Embase.

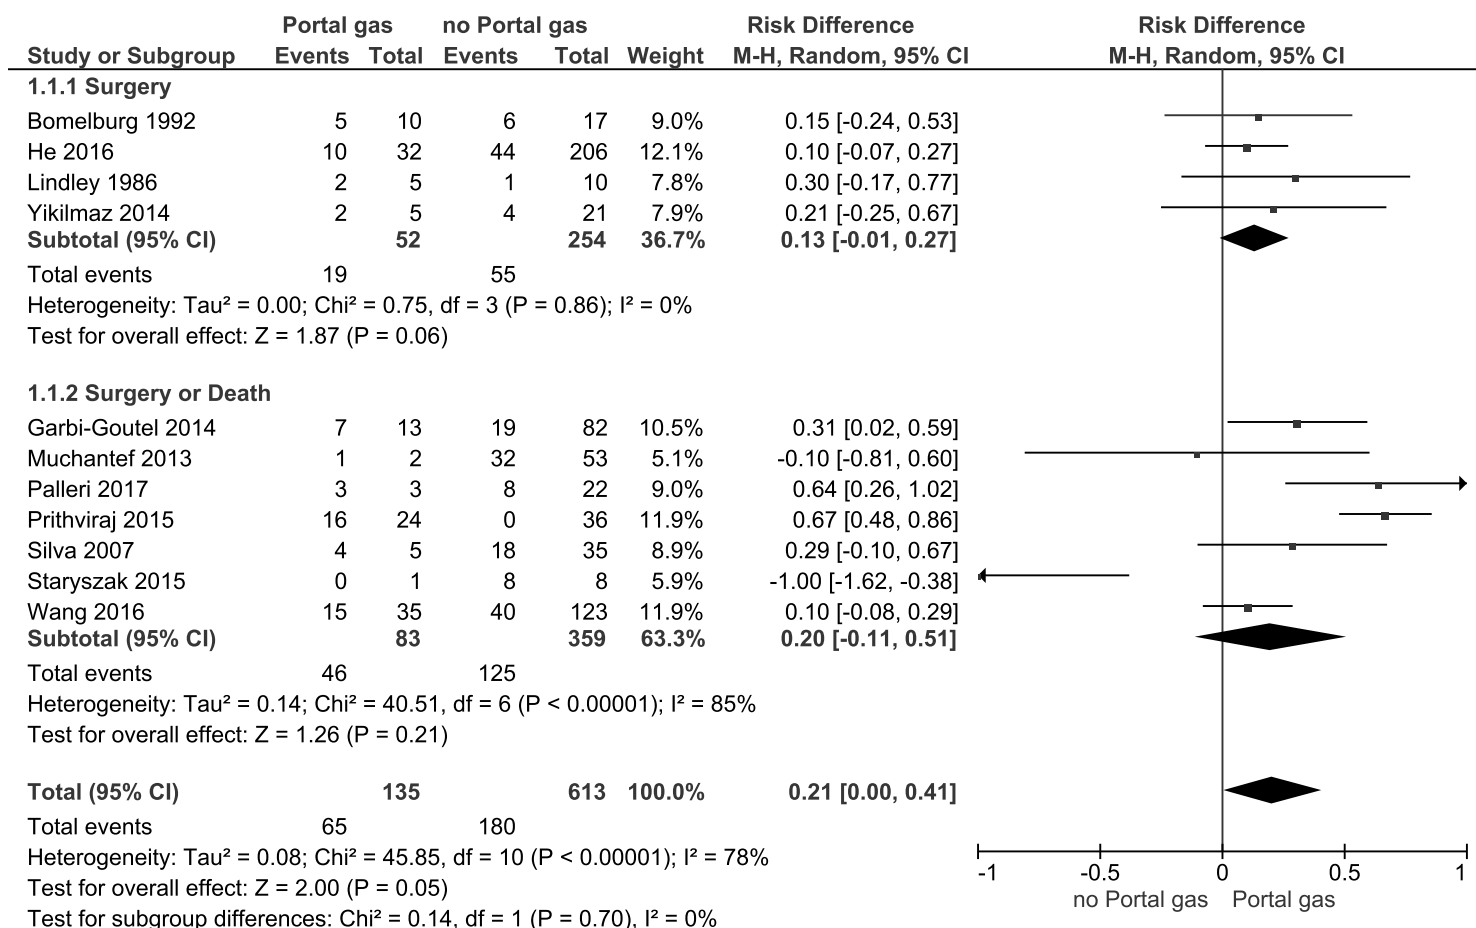

Online Resource 2: Forest plots for association of portal venous gas with surgery and surgery or death. Event refers to either surgery or surgery or death. Odds ratios (95% confidence intervals) for each study are denoted by boxes (lines and arrows). Combined odds ratio estimate for all studies is represented by the diamond. Tau-squared (Tau<sup>2</sup>) >1, Cochran Q (Chi<sup>2</sup>) P<0.1, and inconsistency (I<sup>2</sup>) ≥50% suggests substantial statistical heterogeneity. Z score with P<0.05 indicates test for overall effect was statistically significant. CI = confidence interval. M-H = Mantel-Haenszel test.

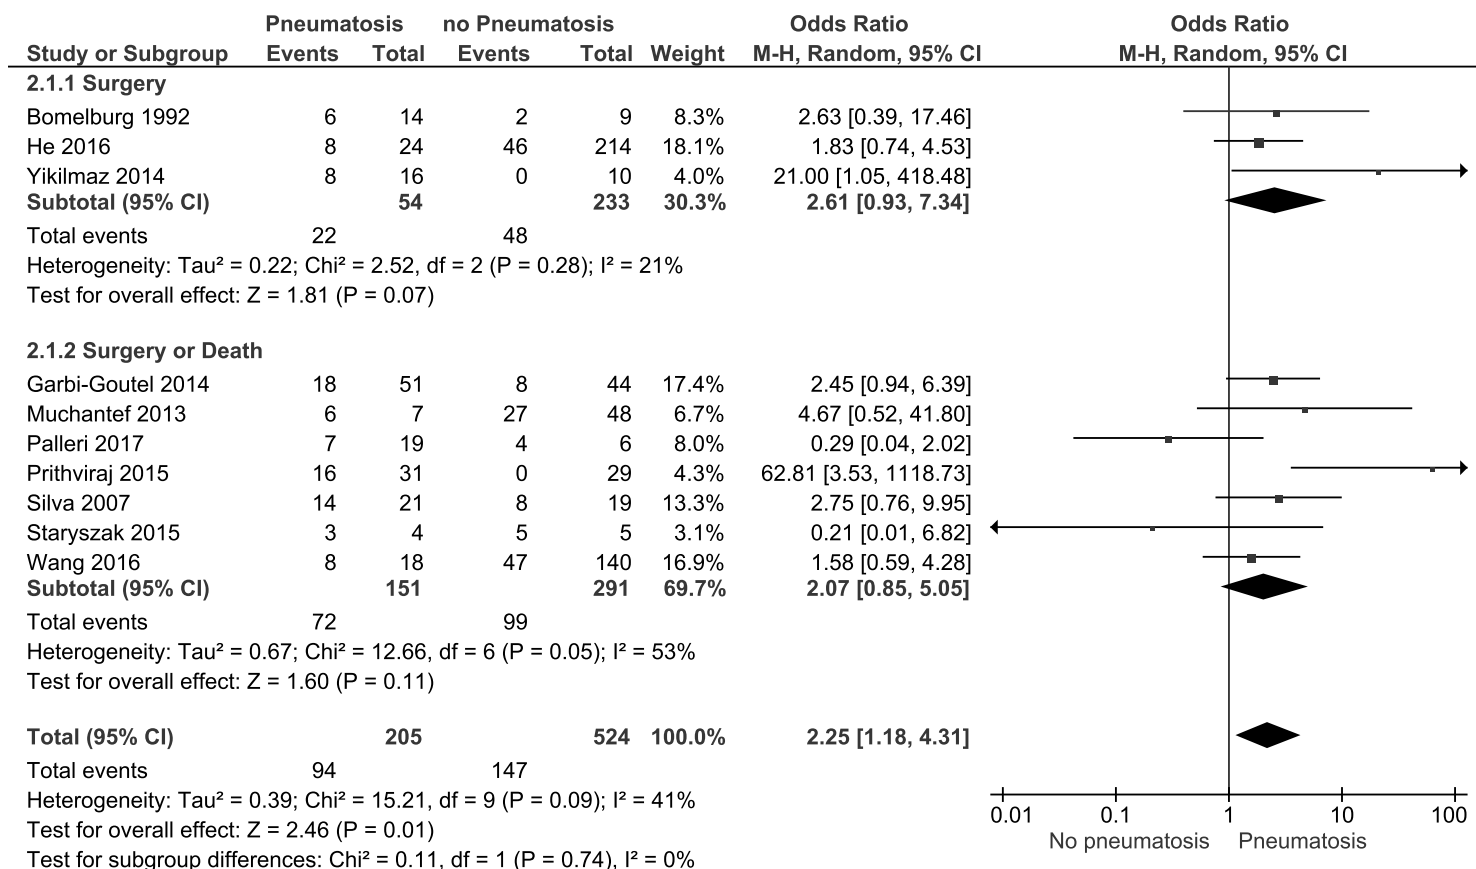

Online Resource 3: Forest plots for association of pneumatosis with surgery and surgery or death. See Online Resource 2 legend for an explanation of symbols and statistics.

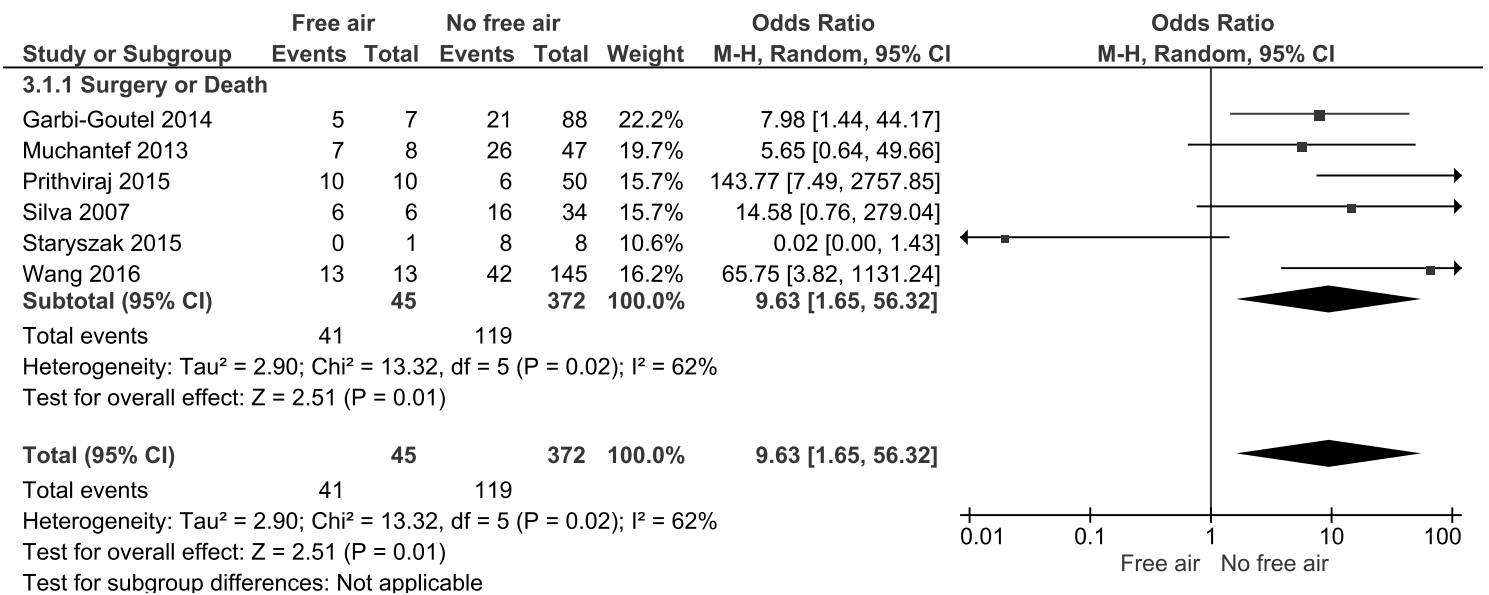

Online Resource 4: Forest plot for association of free air with surgery or death in NEC. See Online Resource 2 legend for an explanation of symbols and statistics.

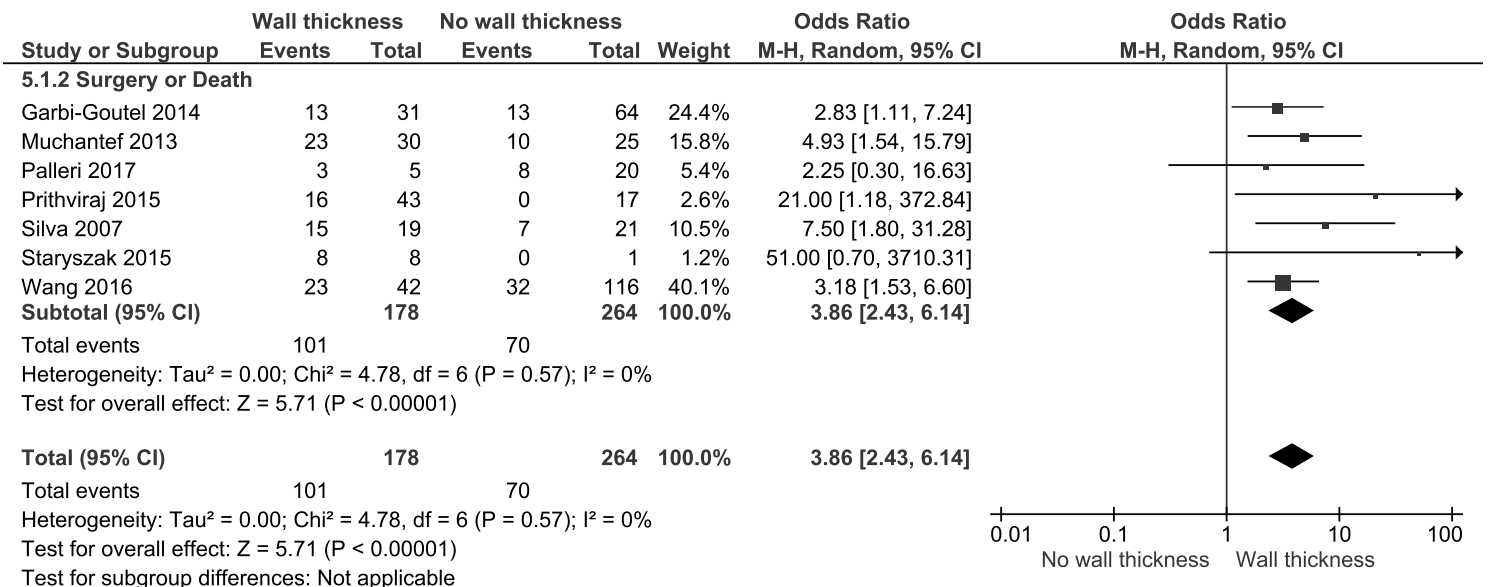

Online Resource 5: Forest plot for association of bowel wall thickening with surgery or death. See Online Resource 2 legend for an explanation of symbols and statistics.

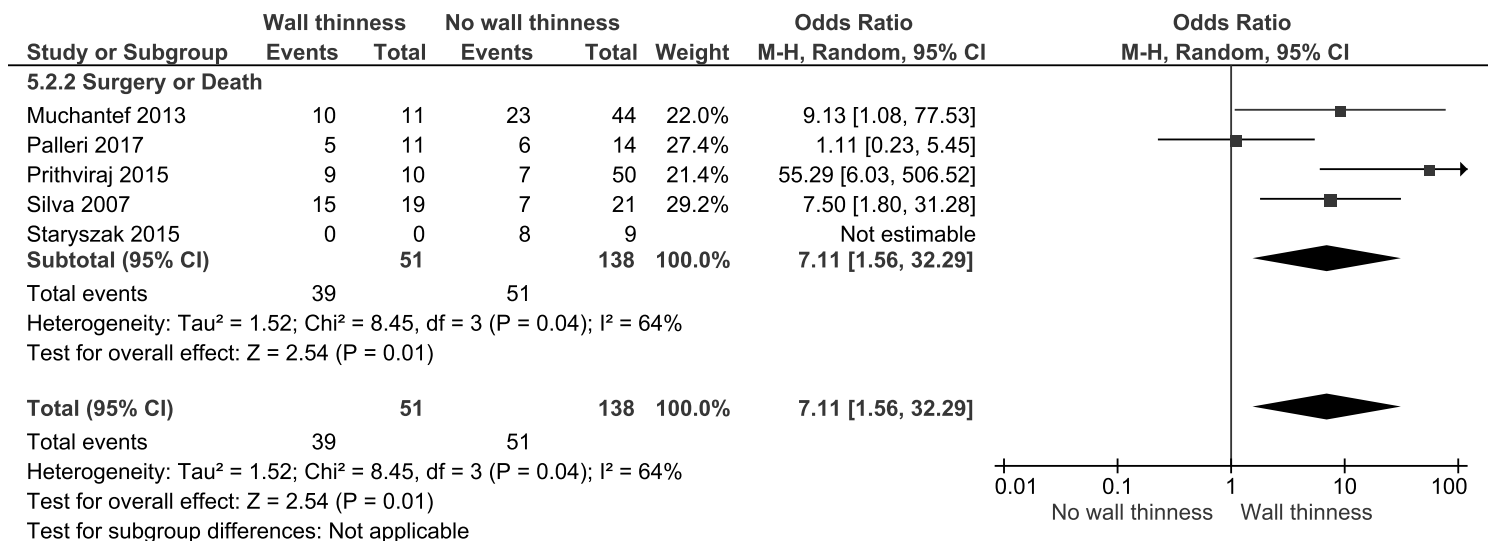

Online Resource 6: Forest plot for association of bowel wall thinning with surgery or death. See Online Resource 2 legend for an explanation of symbols and statistics.

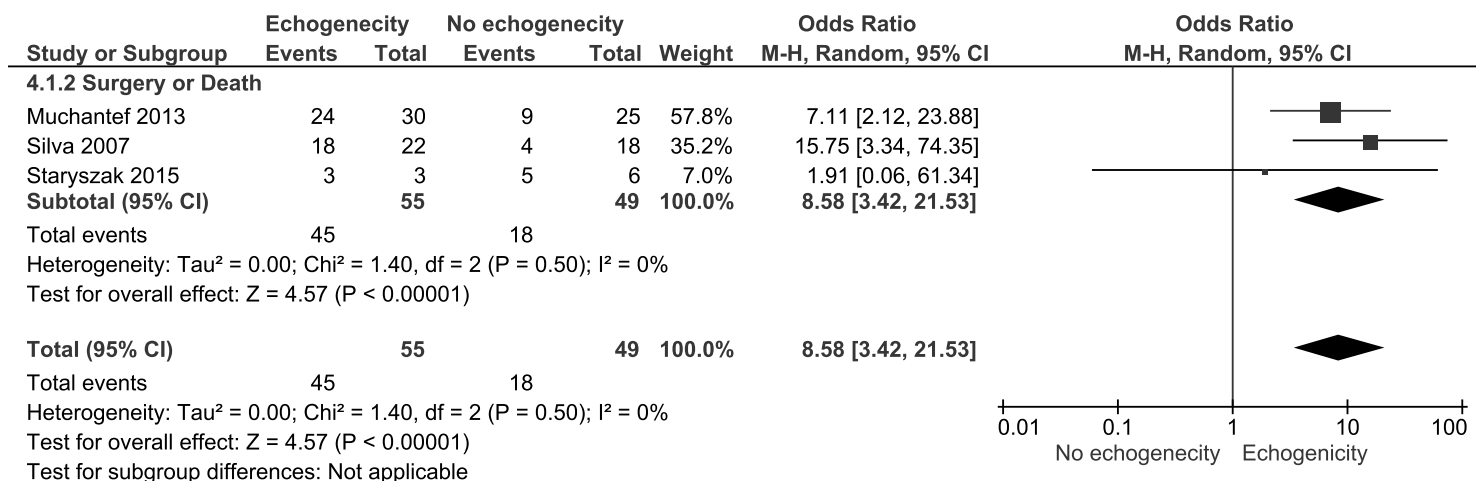

Online Resource 7: Forest plot for association of increased bowel wall echogenicity with surgery or death. See Online Resource 2 legend for an explanation of symbols and statistics.

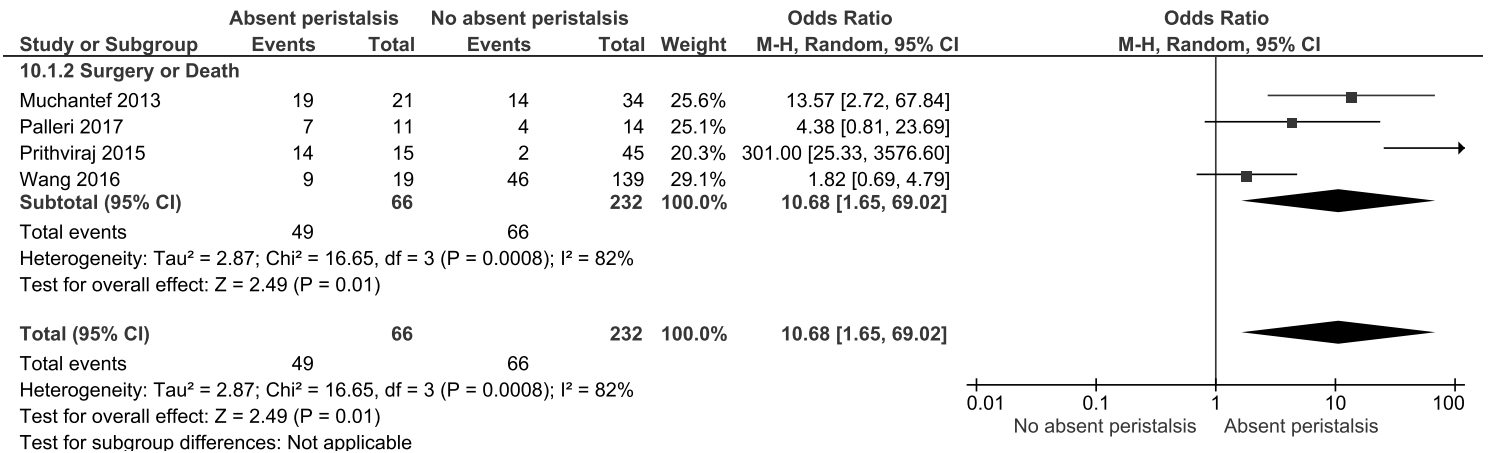

Online Resource 8: Forest plot for association of absent peristalsis with surgery or death. See Online Resource 2 legend for an explanation of symbols and statistics.



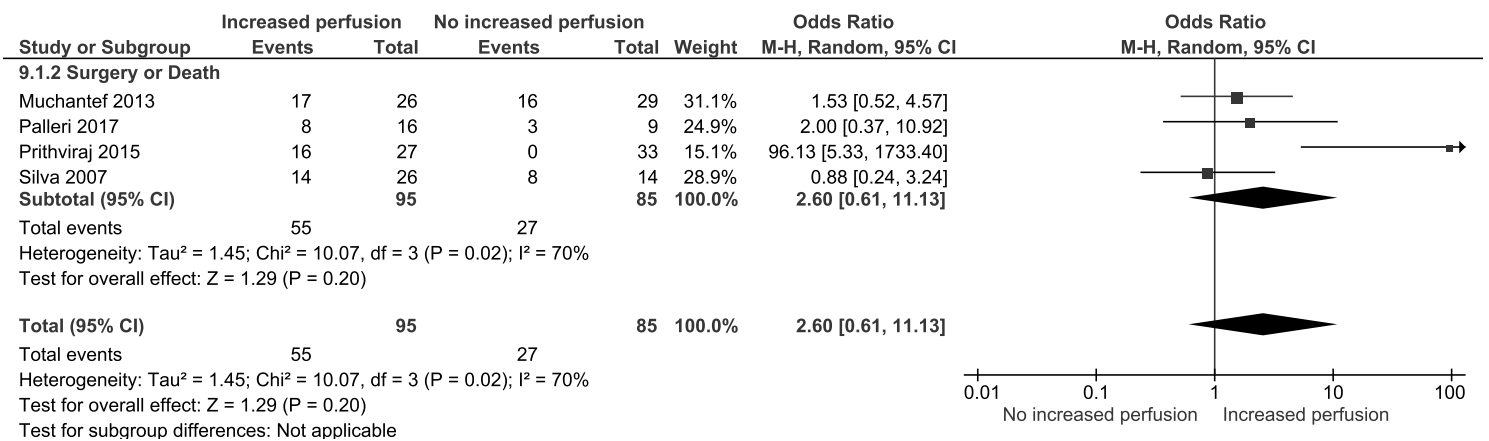

Online Resource 9: Forest plot for association of increased bowel perfusion with surgery or death. See Online Resource 2 legend for an explanation of symbols and statistics.

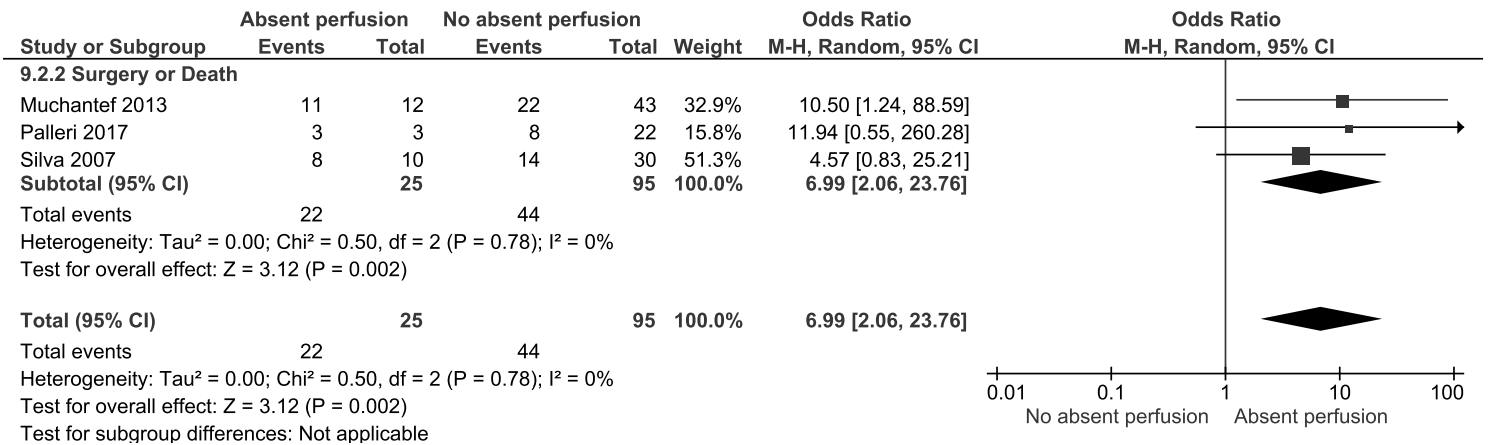

Online Resource 10: Forest plot for association of absent perfusion with surgery or death. See Online Resource 2 legend for an explanation of symbols and statistics.

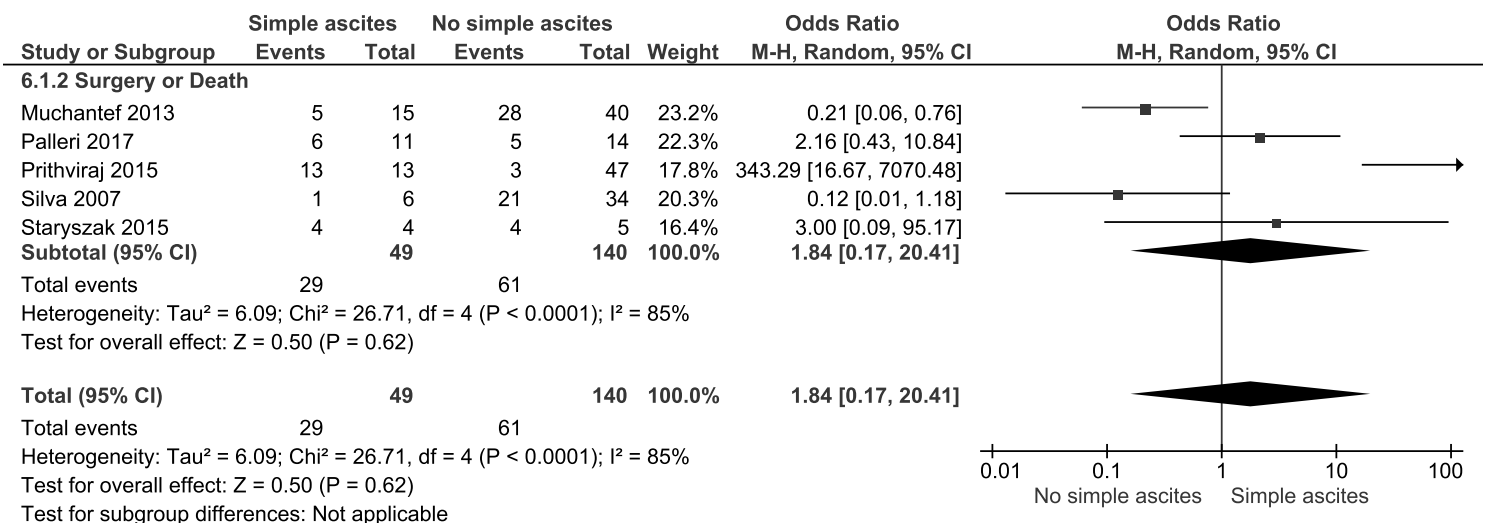

Online Resource 11: Forest plot for association of simple ascites with surgery or death. See Online Resource 2 legend for an explanation of symbols and statistics.

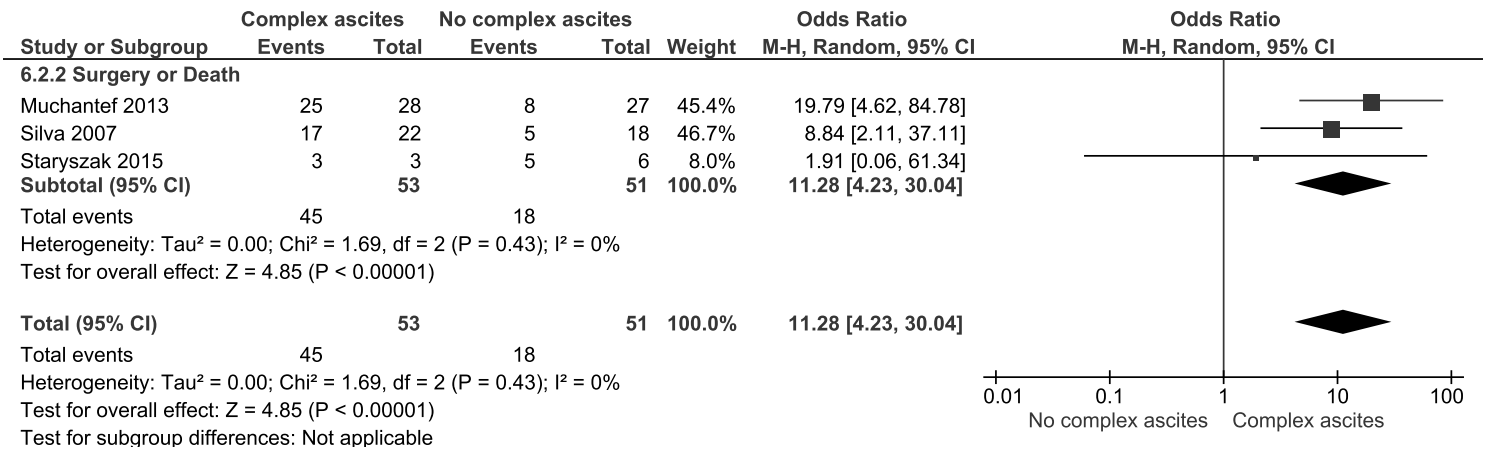

Online Resource 12: Forest plot for association of complex ascites with surgery or death. See Online Resource 2 legend for an explanation of symbols and statistics.

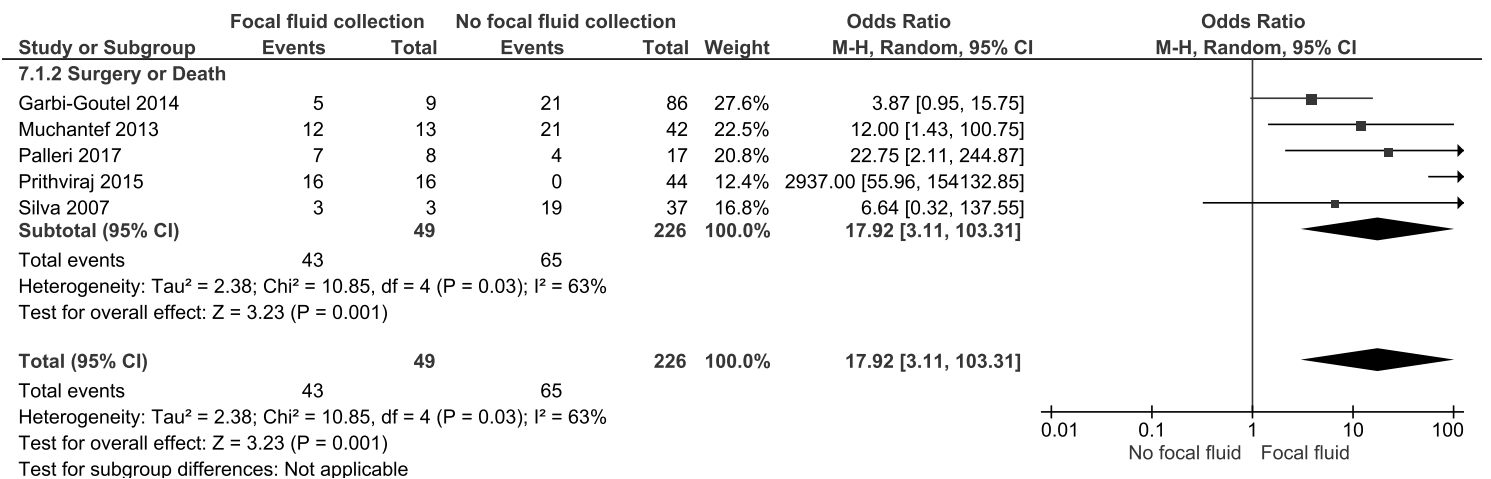

Online Resource 13: Forest plot for association of focal fluid collection with surgery or death. See Online Resource 2 legend for an explanation of symbols and statistics.

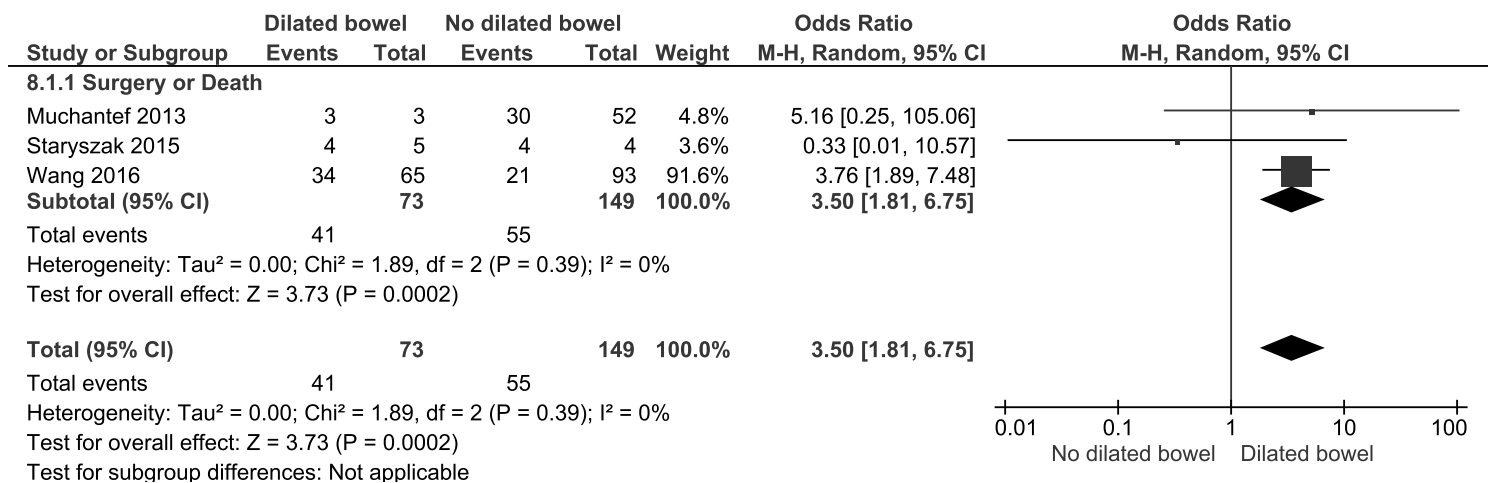

Online Resource 14: Forest plots for association of dilated bowel with surgery or death. See Online Resource 2 legend for an explanation of symbols and statistics.
